# Supplementary material
Source: HighWire-hosted journal article supplement (https://genome.cshlp.org/content/suppl/2012/08/22/22.9.1711)
Supplement: Supp_Material.pdf [file Supp_Material.pdf]

Supplementary Figure 1

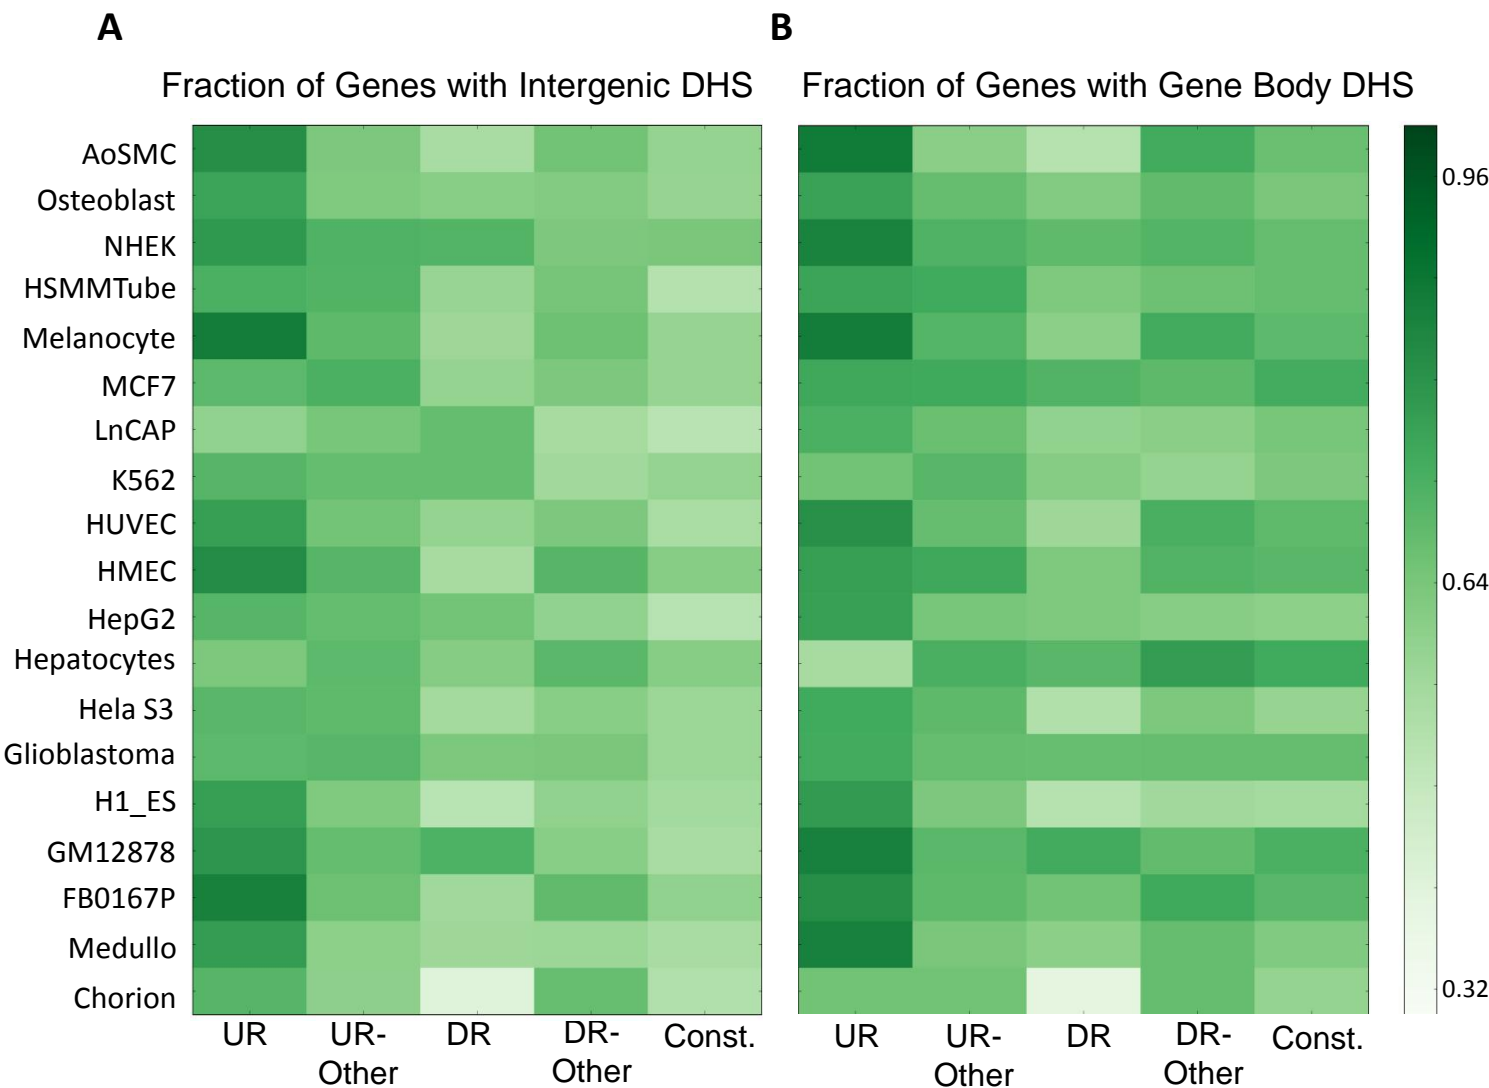

The fraction of genes in each gene set that had Intergenic DHSs **(A)** and Gene Body DHS **(B)**. **(A and B)** share the same color map.

Supplementary Figure 2

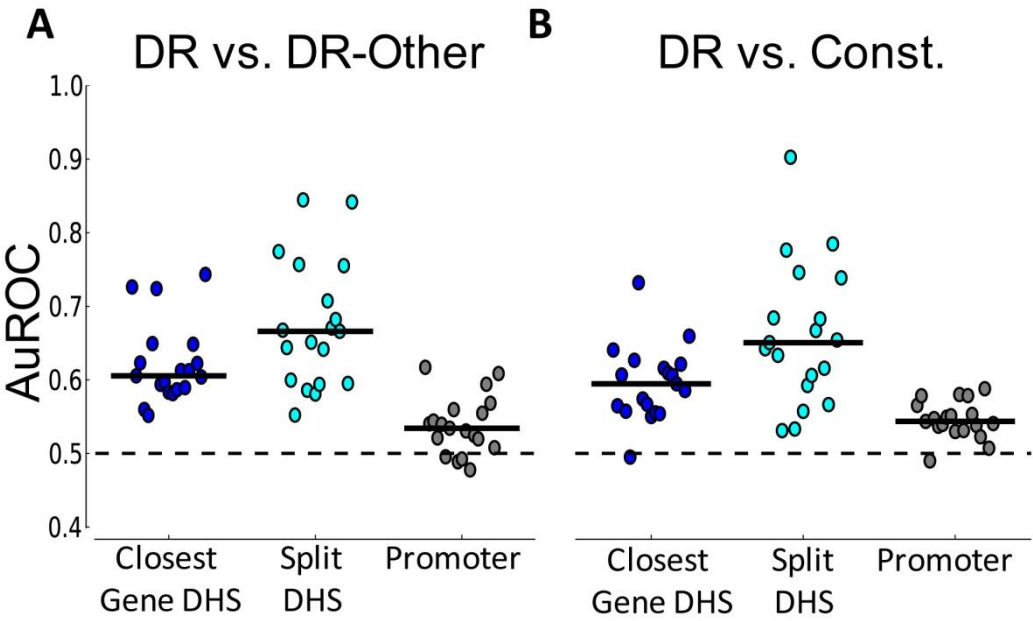

Classifier performance for discriminating DR genes from other classes. **(A, B)** Performance of the classifier using all PWMs. Each figure compares the performance of 2 methods of associating DHSs to genes (Closest Gene DHS and Split DHS) with the proximal promoter. Across all figures, the promoter sequence classifier does not work as well as the performance achieved by using closest gene DHS and Split DHS and is significant at the 0.05 level (t-test). The black lines across the dots indicates the median. All figures show results from 5 iterations of 4-fold cross-validation. The dotted line indicates an AuROC of 0.5 which is the performance of a random classifier.

Supplementary Figure 3

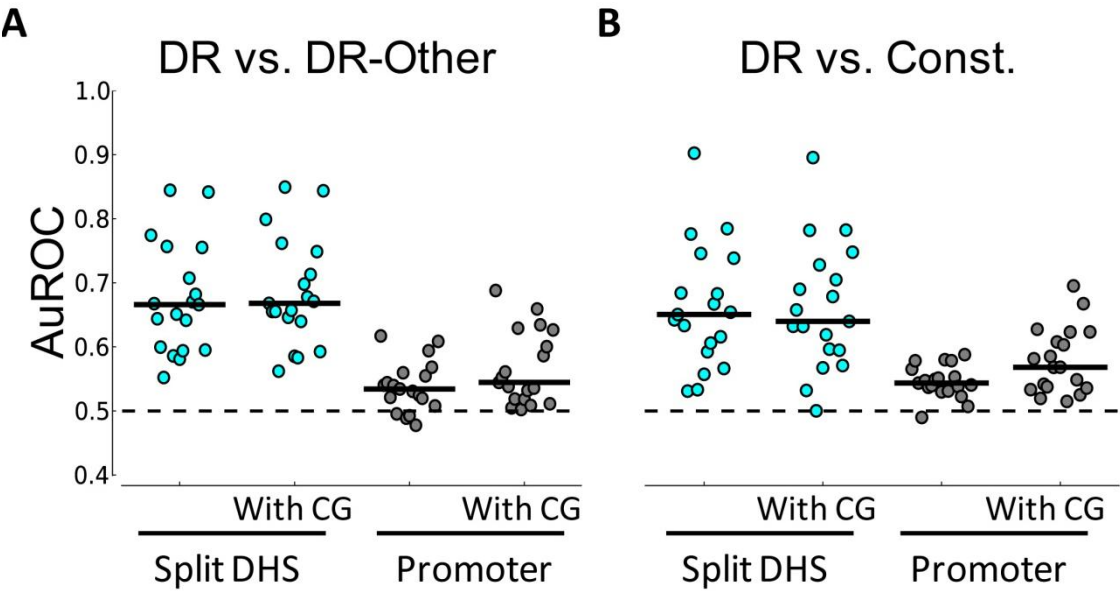

Impact of normalized CG dinucleotide content on classifier performance for discriminating DR genes. **(A, B)** Results using the Split DHS and Promoter sequence are shown. The dotted line indicates an AuROC of 0.5 which is the performance of a random classifier. CG content is shown to help for the proximal promoter where other factors are not informative.

Supplementary Figure 4

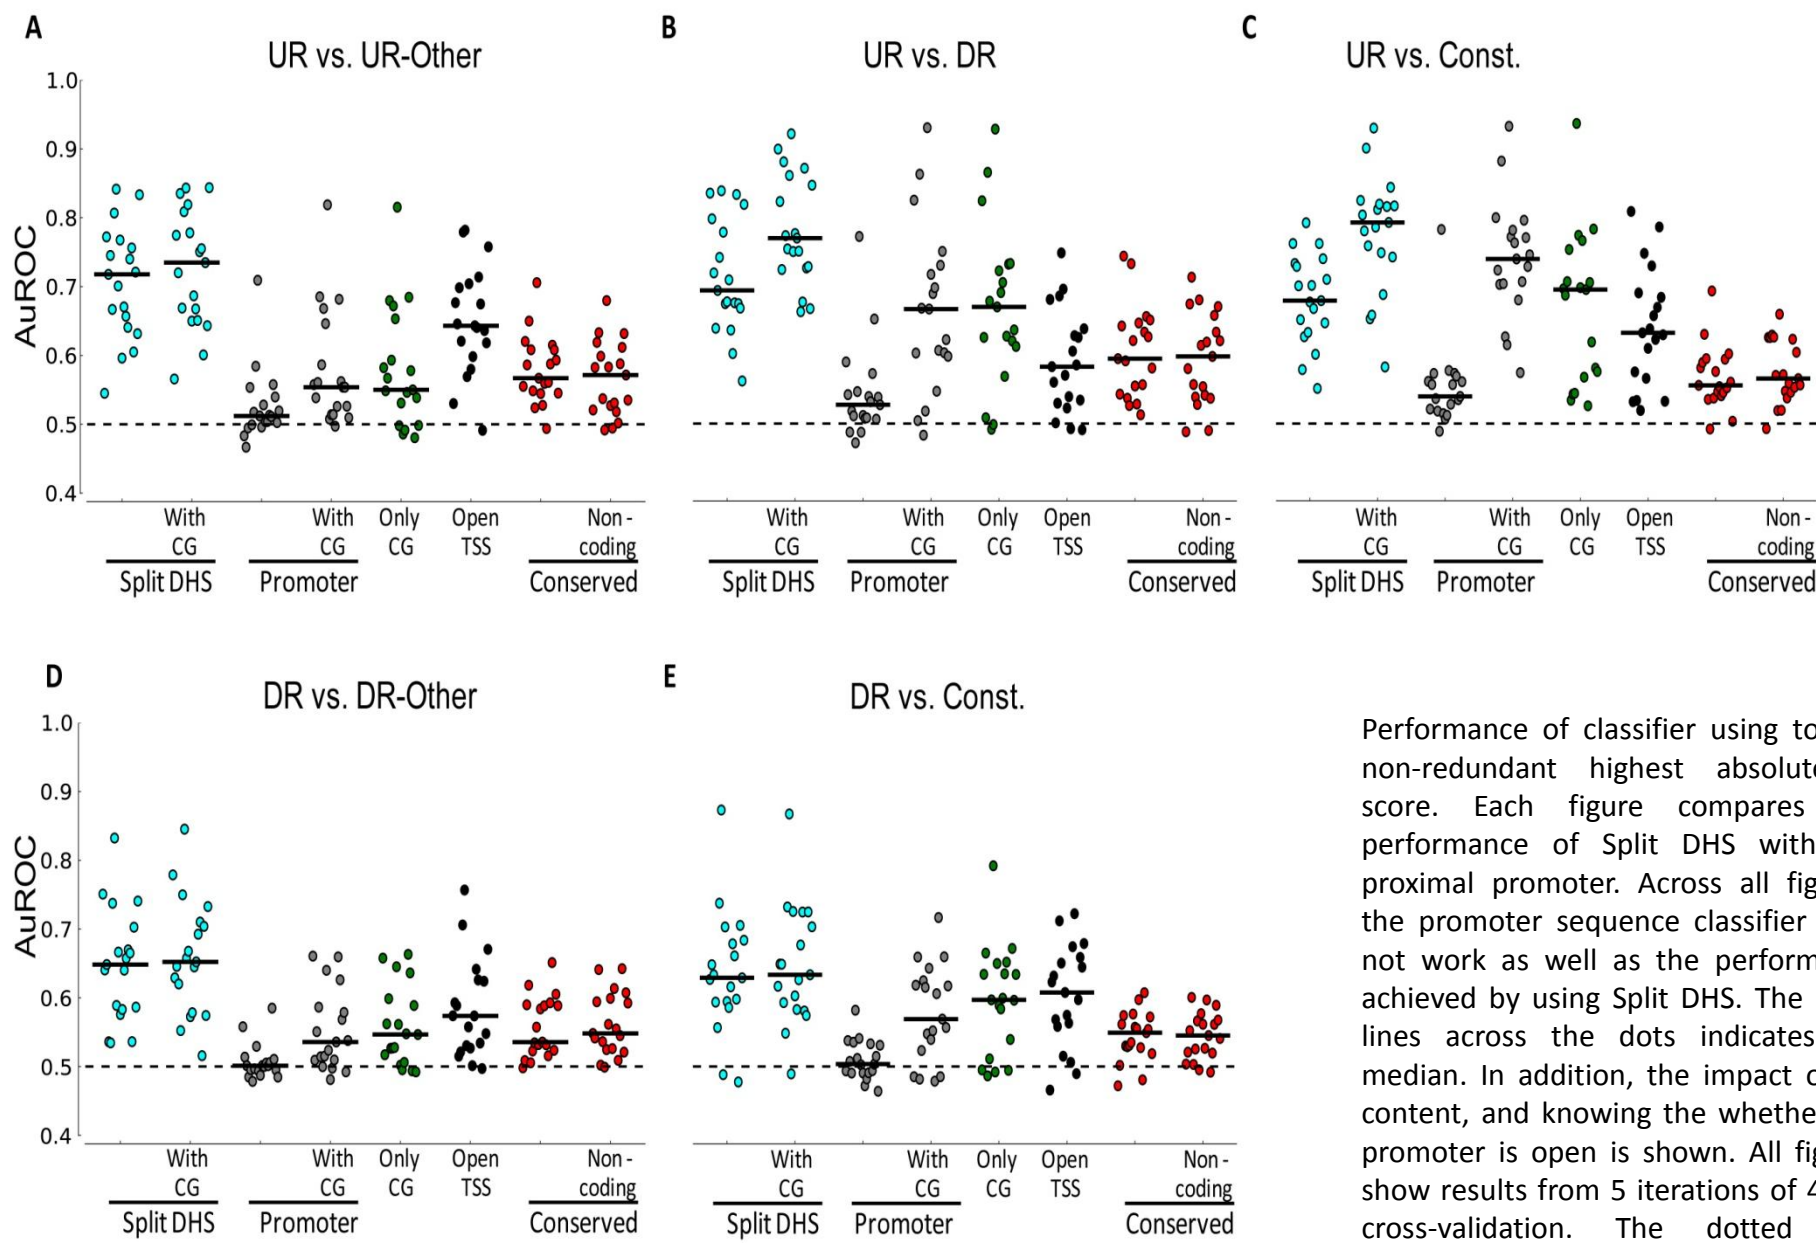

Performance of classifier using top 10 non-redundant highest absolute z-score. Each figure compares the performance of Split DHS with the proximal promoter. Across all figures, the promoter sequence classifier does not work as well as the performance achieved by using Split DHS. The black lines across the dots indicates the median. In addition, the impact of CG content, and knowing the whether the promoter is open is shown. All figures show results from 5 iterations of 4-fold cross-validation. The dotted line indicates an AuROC of 0.5 which is the performance of a random classifier.

Supplementary Figure 5

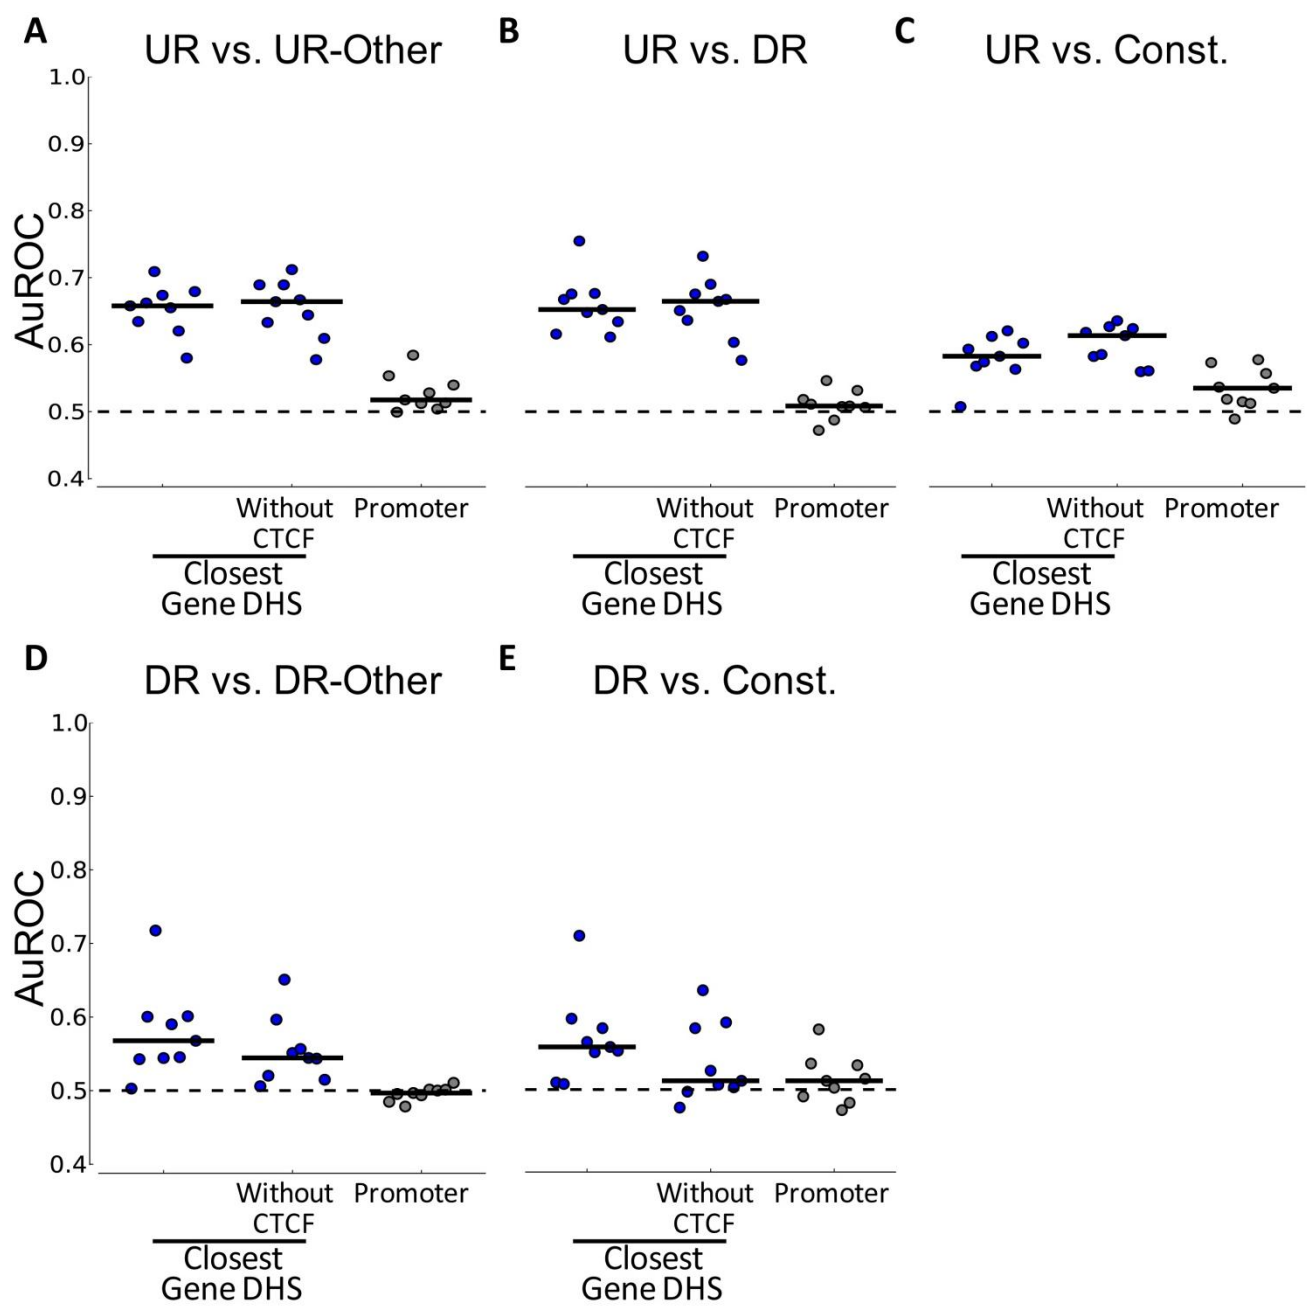

Performance of classifier using top 10 non-redundant highest absolute z-score. Each figure compares the performance of 2 methods of associating DHSs to genes using Closest Gene DHS and the inclusion and exclusion of DHS with CTCF ChIP-seq peaks and with the proximal promoter. Note that only 9 cell lines had CTCF ChIP-seq data. All figures show results from 5 iterations of 4-fold cross-validation. The dotted line indicates an AuROC of 0.5 which is the performance of a random classifier.

Supplemental Table 1

| Cell Line       | Number of DHS | Number of bases in DHS (% of genome size) |
|-----------------|---------------|-------------------------------------------|
| Chorion         | 140042        | 3.55                                      |
| Medulloblastoma | 151858        | 2.44                                      |
| FB0167P         | 126789        | 1.91                                      |
| GM12878         | 124321        | 1.96                                      |
| H1_ES           | 129061        | 2.83                                      |
| Glioblastoma    | 118222        | 1.71                                      |
| Hela S3         | 141165        | 2.04                                      |
| Hepatocytes     | 171897        | 3.48                                      |
| HepG2           | 116018        | 1.72                                      |
| HMEC            | 158764        | 2.37                                      |
| HUVEC           | 126695        | 2.08                                      |
| K562            | 133372        | 1.87                                      |
| LnCAP           | 144070        | 2.82                                      |
| MCF7            | 119828        | 1.58                                      |
| Melanocyte      | 130073        | 1.50                                      |
| HSMMTube        | 161083        | 2.68                                      |
| NHEK            | 140520        | 1.80                                      |
| Osteoblast      | 151381        | 2.45                                      |
| AoSMC           | 121731        | 1.62                                      |

DHS statistics by cell line. Number of DHS per cell line and the total number of bases covered by the DHS peaks

Supplemental Table 2

| Number of Cell<br>Lines TSS Open<br>in | Number<br>of genes |
|----------------------------------------|--------------------|
| 1                                      | 976                |
| 2                                      | 581                |
| 3                                      | 455                |
| 4                                      | 362                |
| 5                                      | 306                |
| 6                                      | 345                |
| 7                                      | 292                |
| 8                                      | 290                |
| 9                                      | 311                |
| 10                                     | 307                |
| 11                                     | 348                |
| 12                                     | 408                |
| 13                                     | 417                |
| 14                                     | 457                |
| 15                                     | 536                |
| 16                                     | 614                |
| 17                                     | 863                |
| 18                                     | 1798               |
| 19                                     | 8393               |

Number of genes in each box plot in Figure 2C. For example, 8393 TSS are in regions of open chromatin in all cell lines.

Supplemental Table 3

| Cell Type       | UR genes | UR Other Genes | DR genes | DR Other genes | Constitutive genes |
|-----------------|----------|----------------|----------|----------------|--------------------|
| Chorion         | 200      | 2340           | 200      | 857            | 168                |
| Medulloblastoma | 200      | 2303           | 200      | 1531           | 168                |
| FB0167P         | 200      | 2191           | 200      | 1763           | 168                |
| GM12878         | 200      | 2610           | 200      | 1347           | 168                |
| H1_ES           | 200      | 2152           | 200      | 1600           | 168                |
| Glioblastoma    | 200      | 2411           | 200      | 2218           | 168                |
| Hela S3         | 200      | 1807           | 200      | 2654           | 168                |
| Hepatocytes     | 200      | 1876           | 200      | 1263           | 168                |
| HepG2           | 200      | 1563           | 200      | 2688           | 168                |
| HMEC            | 200      | 2503           | 200      | 1354           | 168                |
| HUVEC           | 200      | 1866           | 200      | 2230           | 168                |
| K562            | 200      | 2493           | 200      | 1792           | 168                |
| LnCAP           | 200      | 2574           | 200      | 1590           | 168                |
| MCF7            | 200      | 2419           | 200      | 1667           | 168                |
| Melanocyte      | 200      | 2423           | 200      | 1315           | 168                |
| HSMMTube        | 200      | 2358           | 200      | 1523           | 168                |
| NHEK            | 200      | 1276           | 200      | 2955           | 168                |
| Osteoblast      | 200      | 2268           | 200      | 1876           | 168                |
| AoSMC           | 200      | 2421           | 200      | 1734           | 168                |

Number of genes in each category for each cell line. Expression values were first z-score transformed. UR and DR genes were the top and bottom 200 genes, respectively. UR Other genes were genes up-regulated in a different cell line with expression z-score < 0 in the current cell line. Constitutive genes were picked as genes in neither UR or DR sets across all cell lines, were expressed above background in all cell lines and had a maximum absolute z-score of expression less than 1.7 across all cell lines



Supplemental Table 4

| Cell Line       | GO Categories of UR genes                                                                                                                   |
|-----------------|---------------------------------------------------------------------------------------------------------------------------------------------|
| Chorion         | Placenta, inflammatory response, extracellular region, cytokine binding                                                                     |
| Medulloblastoma | Retina, Brain, visual perception, ion channel complex, gated channel activity                                                               |
| B0167P          | Skeletal system development, pattern specification process, extracellular region part, intrinsic to plasma membrane, growth factor activity |
| GM12878         | B-cell, spleen, immune response, cell activation, MHC class II receptor activity                                                            |
| H1_ES           | Brain, ion transport, synapse, plasma membrane, gated channel activity                                                                      |
| Glioblastoma    | Regulation of transcription, DNA-dependent, anterior-posterior pattern formation, DNA binding, zinc ion binding                             |
| Hela S3         |                                                                                                                                             |
| Hepatocytes     | Liver, acute inflammatory response, complement activation, oxygen binding                                                                   |
| HepG2           | Liver, lipid homeostasis, cholesterol metabolic process, sterol homeostasis, extracellular space                                            |
| HMEC            | Keratinocyte, ectoderm development, epidermis development, epithelial cell differentiation                                                  |
| HUVEC           | Umbilical Vein Endothelial cell, angiogenesis, vasculature development, plasma membrane part, cell adhesion                                 |
| K562            | Blood, platelet, hemopoiesis, intrinsic to plasma membrane                                                                                  |
| LnCAP           | Prostate, Prostatic carcinoma, synaptic transmission                                                                                        |
| MCF7            |                                                                                                                                             |
| Melanocyte      | Skin, Melanoma, pigmentation during development, melanocyte differentiation, melanosome                                                     |
| HSMMTube        | Skeletal muscle, heart, muscle system process, muscle tissue development, structural constituent of muscle                                  |
| NHEK            | Keratinocyte, keratinocyte differentiation, epithelial cell differentiation, desmosome                                                      |
| Osteoblast      | Fibroblast, Osteoblast, skeletal system development, extracellular structure organization                                                   |
| AoSMC           | Fibroblast, response to wounding, cell adhesion, extracellular region part, chemokine activity                                              |

GO analysis for UR genes in each cell line. The UP\_Tissue entries from DAVID were used to identify the similarity of expression to known tissue types

Supplemental Table 5

| Cell Line    | Number of DHS<br>with CTCF (% of<br>total) | Number of TSS<br>DHS with CTCF (%<br>of total TSS DHS) | Number of Gene Body<br>DHS with CTCF (% of total<br>Gene Body DHS) | Number of Intergenic<br>DHS with CTCF (% of<br>total Intergenic DHS) |
|--------------|--------------------------------------------|--------------------------------------------------------|--------------------------------------------------------------------|----------------------------------------------------------------------|
| GM12878      | 34065(27.4%)                               | 4696(37.5%)                                            | 12853(22.7%)                                                       | 16516(29.9%)                                                         |
| H1_ES        | 40379(31.3%)                               | 7056(47.9%)                                            | 15597(26.7%)                                                       | 17726(31.6%)                                                         |
| Glioblastoma | 30508(25.8%)                               | 4131(34.6%)                                            | 11166(22.0%)                                                       | 15211(27.4%)                                                         |
| Hela S3      | 37811(26.8%)                               | 4772(39.8%)                                            | 14590(22.9%)                                                       | 18449(28.2%)                                                         |
| HepG2        | 36767(31.7%)                               | 4058(30.4%)                                            | 14321(28.8%)                                                       | 18388(34.7%)                                                         |
| HUVEC        | 27394(21.6%)                               | 3587(26.3%)                                            | 10344(17.4%)                                                       | 13463(25.1%)                                                         |
| K562         | 35335(26.5%)                               | 4610(35.5%)                                            | 13772(21.7%)                                                       | 16953(29.7%)                                                         |
| MCF7         | 39226(32.7%)                               | 5670(45.8%)                                            | 14837(29.3%)                                                       | 18719(32.9%)                                                         |
| NHEK         | 33416(23.8%)                               | 5564(42.1%)                                            | 12415(20.1%)                                                       | 15437(23.6%)                                                         |

Number and percentage of DHS with CTCF ChIP-seq peaks. Across all cell lines, a median of 27.4% of all DHS have a CTCF ChIP-seq peak. BEDTools (Quinlan and Hall 2010) was used to compute overlap.

Supplemental Table 6

| Cell Type       | UR – UR Other Genes |                                                      |                               | UR – DR genes |                          |                            |
|-----------------|---------------------|------------------------------------------------------|-------------------------------|---------------|--------------------------|----------------------------|
|                 | AuROC               | TFs - Positive Coefficient                           | TFs - Negative Coefficient    | AuROC         | Positive Coefficient     | Negative Coefficient       |
| Chorion         | 0.54                |                                                      | <i>ZNF143</i>                 | 0.87          | <i>HBP1</i>              | <i>E2F1, NFYA, GABPA</i>   |
| Medulloblastoma | 0.79                | <i>PDX1, CRX, REST</i>                               |                               | 0.80          | <i>MEF2A, CRX, REST</i>  |                            |
| FB0167P         | 0.74                | <i>DMRT1, JDP2</i>                                   |                               | 0.73          | <i>POU2F1</i>            |                            |
| GM12878         | 0.79                | <i>YY1, NFE2L1-MAFG, SPI1, IRF8</i>                  | <i>E2F3, E2F4-TFDP2, E2F1</i> | 0.76          | <i>INSM1, IRF8</i>       | <i>AHR-ARNT, HINFP</i>     |
| H1_ES           | 0.66                |                                                      |                               | 0.77          | <i>NANOG</i>             | <i>TFAP2A, GABPA, ELK4</i> |
| Glioblastoma    | 0.82                | <i>ZNF143</i>                                        |                               | 0.74          | <i>STAT5B</i>            |                            |
| Hela S3         | 0.84                | <i>USF1, GABPA</i>                                   |                               | 0.84          |                          |                            |
| Hepatocytes     | 0.70                |                                                      | <i>RFX1, ZFP161, FOXN1</i>    | 0.80          | <i>NR2F2, RXRA-NR1H2</i> | <i>E2F1, FOXN1</i>         |
| HepG2           | 0.77                | <i>ZEB1</i>                                          |                               | 0.68          | <i>HNF4A</i>             |                            |
| HMEC            | 0.62                |                                                      |                               | 0.72          |                          | <i>ELK4</i>                |
| HUVEC           | 0.70                | <i>ETS1, SPI1</i>                                    |                               | 0.74          |                          | <i>ELK4, E2F</i>           |
| K562            | 0.69                | <i>YY1, LMO2 bound to TAL1, TCF3 and GATA1, ETS1</i> |                               | 0.60          |                          |                            |
| LnCAP           | 0.66                |                                                      |                               | 0.65          | <i>SOX5</i>              |                            |
| MCF7            | 0.76                | <i>GATA6, ZFX, TCF3, HINFP</i>                       |                               | 0.68          | <i>RBPJ</i>              |                            |
| Melanocyte      | 0.78                | <i>SREBF1, MEF2A, AHR-ARNT</i>                       |                               | 0.84          | <i>MYCN, ELK4</i>        | <i>GABPA</i>               |
| HSMMtube        | 0.64                | <i>MEF2A, PKNOX2</i>                                 | <i>ZNF423, PAX6, PAX3</i>     | 0.79          | <i>BACH2</i>             | <i>NFYA, GABPA</i>         |
| NHEK            | 0.73                | <i>ZNF410</i>                                        |                               | 0.69          | <i>MAF, MTF1</i>         | <i>FOXD1</i>               |
| Osteoblast      | 0.62                |                                                      |                               | 0.61          | <i>MYB</i>               | <i>FOXN1</i>               |
| AoSMC           | 0.87                | <i>DMRT1, CEBPB, PPARG</i>                           |                               | 0.88          | <i>CEBPB, PATZ1</i>      | <i>NFYA</i>                |

Results for each cell line using Split DHS from All TFs for the UR – UR Other and UR – DR classification task. TFs with positive and negative coefficients are shown for both sets of TFs used.

Supplemental Table 7

| Cell Line       | Cell-Type Specifically Up-Regulated TFs                                 | Cell-Type Specifically Down-Regulated TFs          |
|-----------------|-------------------------------------------------------------------------|----------------------------------------------------|
| Chorion         | <i>ASCL2, EGR1, OSR2, GCM1, DLX5</i>                                    | <i>IRF3, E2F3, ZFP161, USF1, ELK1</i>              |
| Medulloblastoma | <i>CRX, INSM1, NHLH1, HLX, SIX3, SOX11</i>                              | <i>REST, SMAD3, NR2F2, SP100</i>                   |
| FB0167P         | <i>ZBTB12, STAT1, LHX9, ZIC1, OSR1, HOXC11</i>                          | <i>AIRE, RFX3, IRF5, BACH2</i>                     |
| GM12878         | <i>HIC1, ARID5A, IRF4, SPIB, EGR2, POU2F2</i>                           | <i>FOXP1, GLIS2, TCF7L2, BCL6</i>                  |
| H1_ES           | <i>ZBTB3, MYCN, SOX21, SOX11, ZIC3, SOX2, OTX2</i>                      | <i>MEIS1, NR2F2, HOXC9</i>                         |
| Glioblastoma    | <i>IRF3, HOXD10, HOXB5, NKX3-2, PAX6, ZIC1, PITX2, HOXD11</i>           | <i>AHR, STAT5A</i>                                 |
| Hela S3         | <i>ESRRA, E2F2, PAX6, ARNT, SP1, MAFK, ELK1, FOXF2, ATF1, MEOX1</i>     |                                                    |
| Hepatocytes     | <i>BACH2, HNF4A, RXRA, AR, STAT3</i>                                    | <i>FOXJ3, E2F3, RFX7, SIX4, HOXA6</i>              |
| HepG2           | <i>CEBPA, HNF1A, GFI1, HNF4A, HOXD1, NFYA, FOXA2, HOXA3, TCF7, SOX9</i> |                                                    |
| HMEC            | <i>STAT4, IRF6, EGR3, OSR1, HOXA5</i>                                   | <i>ZBTB3, DR1, HOXA11, SIX1, HOXA5, PAX2</i>       |
| HUVEC           | <i>SOX18, GBX2, HIC1, ARID5A, SOX17, HOXA3, BCL6B, HOXA9</i>            | <i>ZBTB6, BACH1</i>                                |
| K562            | <i>WT1, HOXB9, GFI1B, ESRRB, STAT5A, LEF1, MYB, GATA1</i>               | <i>ARX, KLF7</i>                                   |
| LnCAP           | <i>ZBTB7B, HOXC6, AR, NKX3-1, MAFB, ELF5, HOXB13</i>                    | <i>FOXJ1, STAT6, KLF7</i>                          |
| MCF7            | <i>ESR1, SPDEF, LMX1B, IRX5, GSC, MSX2, GATA3</i>                       | <i>SOX14, POU6F1, FOXI1</i>                        |
| Melanocyte      | <i>MAF, IRF4, PAX3, TBX5, IRX6, LEF1</i>                                | <i>NKX3-1, BBX, GABPA, CUX1</i>                    |
| HSMMTube        | <i>MYF6, SOX11, SIX1, PITX2</i>                                         | <i>ZBTB3, ZBTB12, HOXD13, GATA6, STRA13, HLXB9</i> |
| NHEK            | <i>FOXJ2, VDR, MTF1, SOX15, EHF, SOX8, HOXA1, MAF, IRX4, GATA5</i>      |                                                    |
| Osteoblast      | <i>STAT4, STAT1, EGR2, BACH1, SIX1, HOXA11, GLIS2, BARX1, PROP1</i>     | <i>SOX21</i>                                       |
| AoSMC           | <i>OSR1, MEIS1, HBP1, CUX1,</i>                                         | <i>POU3F2, HOXC11, PAX4, SOX8, PITX3, SOX7</i>     |

Top 10 non-redundant highest absolute expression z-score in each cell line.

Supplemental Table 8

| Cell Line       | UR – UR Other Genes                            | UR – DR Genes                             |
|-----------------|------------------------------------------------|-------------------------------------------|
| Chorion         | <i>SPI1</i>                                    | <i>FOXP1, SP1</i>                         |
| Medulloblastoma | <i>TAL1-GATA1</i>                              | <i>EWSR1-FLI1</i>                         |
| FB0167P         | <i>SPI1</i>                                    | <i>SPI1</i>                               |
| GM12878         | <b><i>SPIB</i></b> *, <b><i>FOXP1</i></b>      | <b><i>SPIB</i></b> *, <b><i>FOXP1</i></b> |
| H1_ES           | <b><i>ZIC3</i></b> *, <i>EWSR1-FLI1, FOXP1</i> | <i>EWSR1-FLI1,SP1, FOXP1</i>              |
| Glioblastoma    | <i>EWSR1-FLI1, NFE2L2</i>                      | <i>IRF</i>                                |
| Hela S3         | <i>EWSR1-FLI1, TAL1-GATA1,FOXF2</i> *          | <b><i>SP1, FOXF2</i></b> *                |
| Hepatocytes     | <b><i>STAT3</i></b> *                          | <b><i>FOXJ3</i></b> *                     |
| HepG2           | <i>SP1, ZNF219, FOXA2</i>                      | <i>SP1, FOXA2</i> *                       |
| HMEC            | <i>SPI1</i>                                    | <i>ETS2</i>                               |
| HUVEC           | <i>ETS2, FOXP1, ZBTB7B</i>                     | <i>EWSR1-FLI1, ZBTB7B</i>                 |
| K562            | <i>FOXP1, SP1, WT1</i>                         | <b><i>WT1, FOXP1</i></b>                  |
| LnCAP           | <b><i>ELF5</i></b>                             | <b><i>ELF5</i></b>                        |
| MCF7            | <b><i>FOXI1</i></b>                            | <b><i>GATA3</i></b> *                     |
| Melanocyte      | <i>IRF, SP1</i>                                | <i>IRF, IRX6</i>                          |
| HSMMTube        | <i>IRF</i>                                     | <i>IRF</i>                                |
| NHEK            | <i>ZNF219, FOXJ2, SP1</i>                      | <i>SP1,FOXJ2</i>                          |
| Osteoblast      | <i>IRF, SP1</i>                                | <i>IRF</i>                                |
| AoSMC           | <i>EWSR1-FLI1, ZNF281, NFE2L2, FOXP1</i>       | <b><i>PAX4, SOX7, IRF</i></b>             |

Matches to motifs identified using MEME. Motifs were first compared to the top10 non-redundant TFs using STAMP. The matches found to that list are shown in bold. \* indicates that the TF also was identified in the classifier as being predictive.
